# Supplementary material
Source: HighWire-hosted journal article supplement (https://www.g3journal.org/content/suppl/2013/10/31/g3.113.008565)
Supplement: FigureS1.pdf [file FigureS1.pdf]

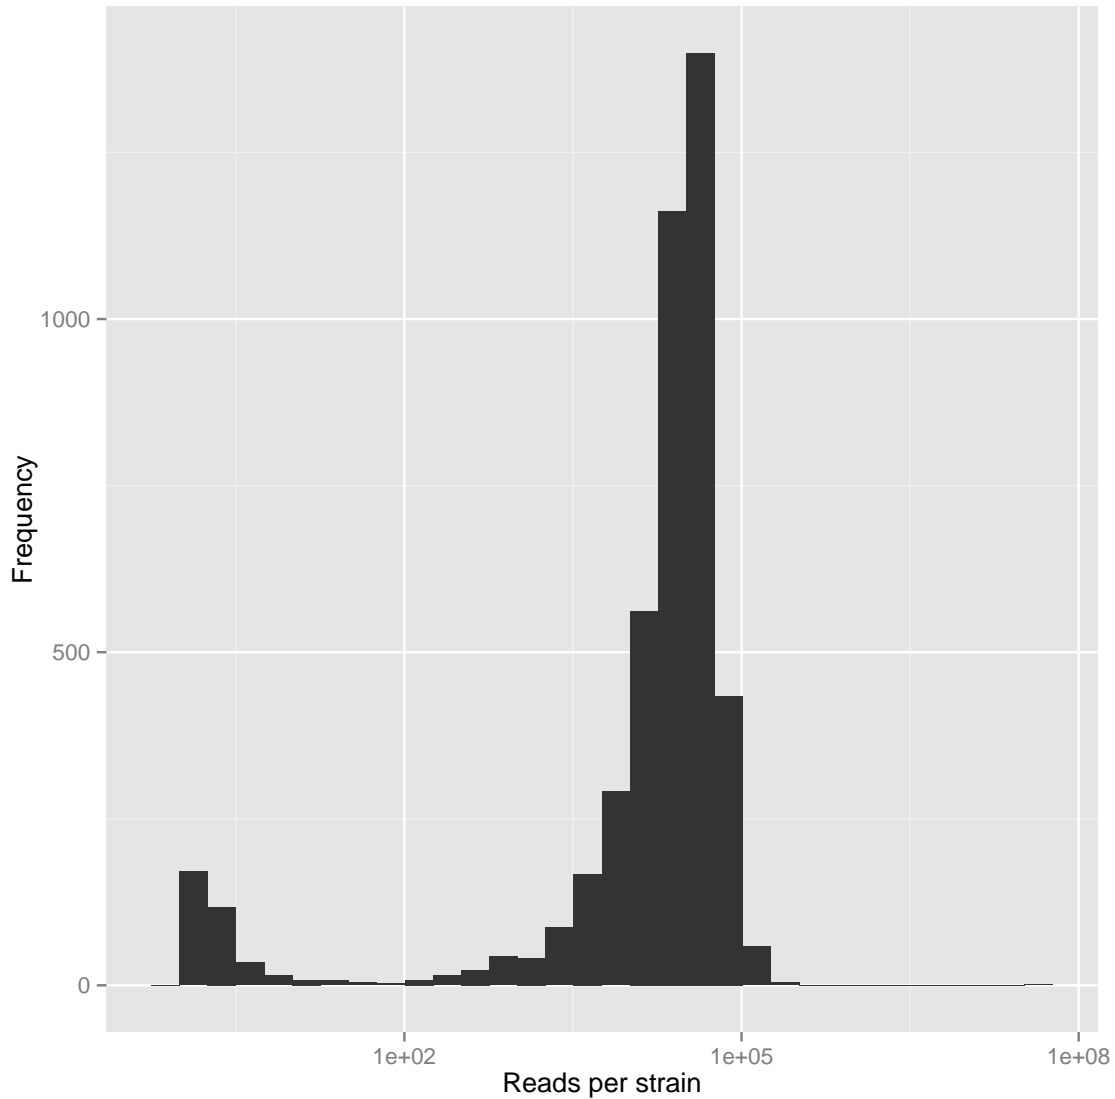

Figure S1: **Distribution of the number of reads for all identified mutants.** Most mutants follow an approximately log-normal distribution in terms of their abundance, with an additional group of mutants that had fewer than 100 counts across all 20 samples, probably due to sequencing error.
