# Supplementary material
Source: HighWire-hosted journal article supplement (https://www.g3journal.org/content/suppl/2013/10/31/g3.113.008565)
Supplement: FigureS6.pdf [file FigureS6.pdf]

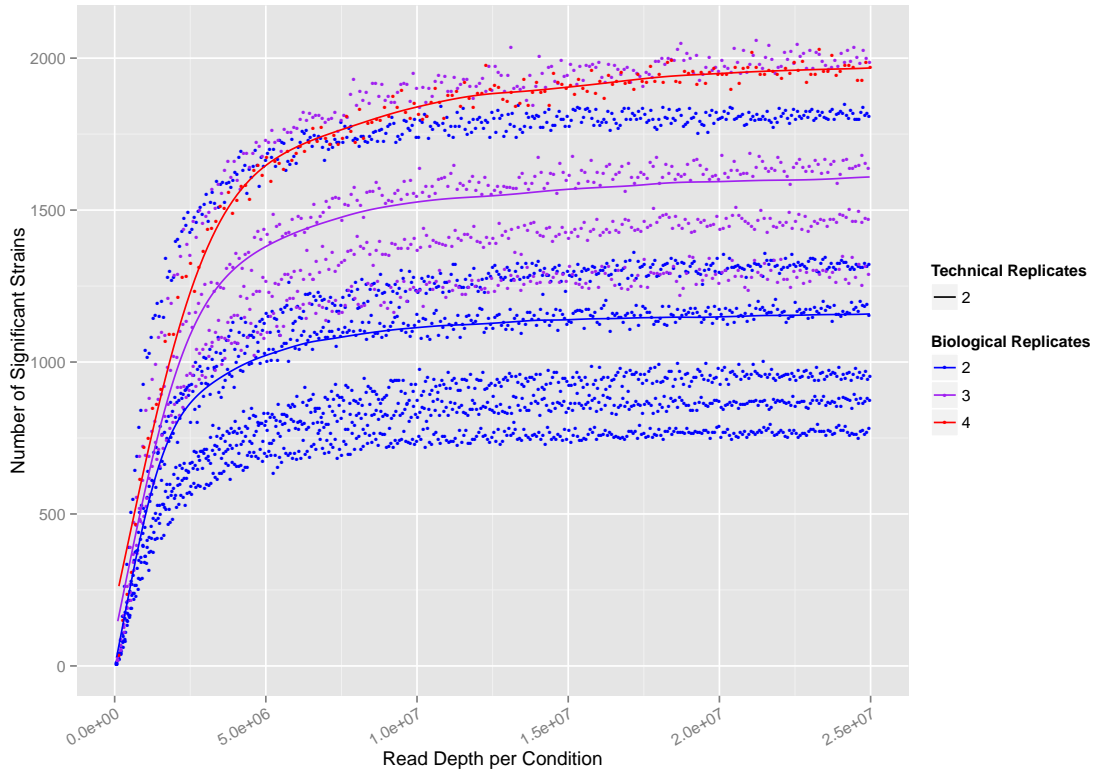

Figure S6: **The number of significant mutants at different read depths for different subsets of subsampling experiments.** A spline is fit to the results for each of comparison.
